# Supplementary material for: Analysis of Patient Information and Differential Diagnosis with Clinical Reasoning in Pre-Clinical Medical Students
Source: MDPI journal article supplement (doi:10.3390/ime3010003), 2024-01-16
Supplement: s1 [file s1]

Article

# Analysis of patient information and differential diagnosis with clinical reasoning in pre-clinical medical students

Dichitchai Mettarikanon <sup>1</sup> and Weeratian Tawanwongsri <sup>2,\*</sup>

## Supplementary file

Table S1. Learning organization and data collection in the short interactive workshop

| Step | Mini-lecture topics                                                                                              | Small-group learning                                                                                                                                                                                                                                                                                                               | Assessment                                                                                                                                              |
|------|------------------------------------------------------------------------------------------------------------------|------------------------------------------------------------------------------------------------------------------------------------------------------------------------------------------------------------------------------------------------------------------------------------------------------------------------------------|---------------------------------------------------------------------------------------------------------------------------------------------------------|
| Day1 |                                                                                                                  |                                                                                                                                                                                                                                                                                                                                    |                                                                                                                                                         |
| 1    |                                                                                                                  |                                                                                                                                                                                                                                                                                                                                    | Pre-intervention assessment:<br><ul style="list-style-type: none"> <li>• A one-vignette test</li> <li>• A survey on self-evaluated CR skills</li> </ul> |
| 2    | The process of clinical reasoning using dual-process theory                                                      | Participants summarized what they had learned in the given papers. And they presented it in front of the class.                                                                                                                                                                                                                    |                                                                                                                                                         |
| 3    | The methods of analyzing patients' information, generating illness scripts, and defining a problem list          | Each group received two clinical scenarios and was instructed to: <ul style="list-style-type: none"> <li>• Summarize pertinent subjective and objective data</li> <li>• Generate illness scripts</li> <li>• Define a problem list</li> </ul> Following this, the instructor provided constructive feedback.                        |                                                                                                                                                         |
| 4    | The construction of a differential diagnosis using diagnostic frameworks                                         | Participants were tasked with creating a differential diagnosis based on provided scenarios, after which the instructor offered constructive feedback.                                                                                                                                                                             |                                                                                                                                                         |
| 5    | Contrasting competing illness scripts and a contrastive learning strategy to establish the most likely diagnosis | After selecting four potential diseases to explain the clinical manifestations, the participants filled out a table comparing variables such as epidemiology, time course, syndrome statement, mechanism, and investigation. This exercise helped them distinguish between diseases and identify key features. Using a contrastive |                                                                                                                                                         |

|             |                                                                                          |                                                                                                                                                                                                        |                                                                                                                                                                                                 |
|-------------|------------------------------------------------------------------------------------------|--------------------------------------------------------------------------------------------------------------------------------------------------------------------------------------------------------|-------------------------------------------------------------------------------------------------------------------------------------------------------------------------------------------------|
|             |                                                                                          | learning strategy, they then determined the most likely diagnosis and presented their findings to the class, followed by constructive feedback from the instructor.                                    |                                                                                                                                                                                                 |
| <b>Day2</b> |                                                                                          |                                                                                                                                                                                                        |                                                                                                                                                                                                 |
| 6           | How to apply CR in PBL?                                                                  | Participants suggested methods for applying CR in PBL and presented their ideas to the class.                                                                                                          |                                                                                                                                                                                                 |
| 7           | How can we effectively raise background and foreground questions during the PBL process? | Each group was given three scenarios and instructed to formulate questions based on them. They then presented their questions to the class, after which the instructor provided constructive feedback. |                                                                                                                                                                                                 |
| 8           |                                                                                          |                                                                                                                                                                                                        | Post-intervention assessment: <ul style="list-style-type: none"> <li>• A one-vignette test</li> <li>• A survey on self-evaluated CR skills</li> <li>• A survey on perspectives on CR</li> </ul> |

Note. CR, clinical reasoning; PBL, problem-based learning
